# Supplementary material for: Assessing the impact of predatory journals on policy and guidance documents: a cross-sectional study protocol
Source: HighWire-hosted journal article supplement (doi:10.1136/bmjopen-2021-059445), 2022-04-01
Supplement: bmjopen-2021-059445supp001_data_supplement.pdf [file bmjopen-2021-059445supp001_data_supplement.pdf]

## Appendix 1. Data Extraction

### Policy/Guidance Document Data Extraction

1. How many times is an OMICS article cited by this policy document?
2. How many different OMICS articles are cited?
3. Snippet of text - a couple sentences that describes policy document
4. Who provided funding for the document (eg. NIH)?
5. What is the broad category of this article?
6. Are methods described for article selection in this policy document?
7. Is the quality of selected articles assessed in the policy document?
8. If available, please enter a contact email address for the POLICY DOCUMENT. Use corresponding author or an individual's email if possible.
9. Optional notes
10. What is the title of this policy/guidance document?
11. What is the URL of this document?
12. Policy PDF URL.
13. What is the source ID?
14. What is the name of the source of the document?
15. What is the type of agency?
16. What is the publication date of the document?
17. What is the country of origin of the document?
18. What is the Policy Document ID?
19. What are the 3 top topics?
20. Citation count.
21. Citations (including same source)

### Journal Article Cited Extraction

1. Omics count.
2. Article Snippet.
3. What is the DOI of this OMICS article?
4. In which OMICS journal is the article published? Use full journal name from PDF document.
5. In what year was the OMICS article published?
6. What is the title of the cited article?
7. What page of the policy document is the OMICS citation found?
8. How is the predatory article cited in the policy/ guidance document?
9. Enter university name for first listed affiliation of corresponding author. If no corresponding author, use first listed author's first affiliation.
10. What country is the corresponding author affiliated to?
11. How many authors does this study have?
12. What type of study is documented in the journal article?
13. Is there any funding listed? If yes, who provided funding for this study?
14. Was ethical approval granted for this study?
15. Who was the population of study?
16. If study used humans or animals please expand?
17. What is the broad category of this article?
18. Optional Notes
